# Supplementary material
Source: PubMed Central journal article supplement (PMC4495227)

**Supplemental Material Figure Legends:**

Fig. S1 rarefaction curve of five clone libraries

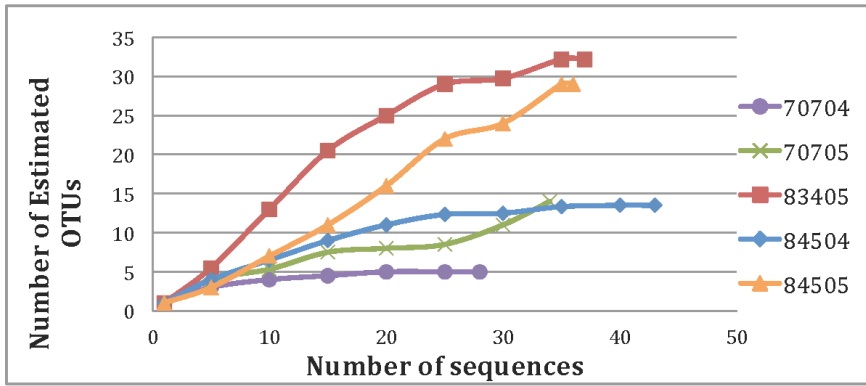

Supplement: AEM.00832-15_zam999116446so1.pdf [file AEM.00832-15_zam999116446so1.pdf]
